# Supplementary material for: Clinical impact of genomic testing in patients with suspected monogenic kidney disease
Source: PubMed Central journal article supplement — Genet Med. 2020 Sep 17;23(1):183–91. doi: 10.1038/s41436-020-00963-4 (PMC7790755; doi:10.1038/s41436-020-00963-4), 2020-09-17

Supplementary table S2: Clinical characteristics and management implications of the 80 patients in whom pathogenic or likely pathogenic mutations in known monogenic kidney disease genes were identified on exome sequencing

Please refer to supplementary excel file

Supplementary Table S3. Variants of potential clinical relevance but of uncertain clinical significance

Please refer to supplementary excel file

| ID, Age, Sex                  | Referral diagnosis               | Presenting features, CKD stage, HPO term                                                                      | Gene, ES diagnosis, OMIM No.                                                       | Mutation Description                                                                                                                  |
|-------------------------------|----------------------------------|---------------------------------------------------------------------------------------------------------------|------------------------------------------------------------------------------------|---------------------------------------------------------------------------------------------------------------------------------------|
| <b>P007<br/>2<br/>Male</b>    | Brachio-oto-renal (BOR) syndrome | [HP:0012583] unilateral renal hypoplasia<br>HP:0010721 Abnormal hair whorl<br>[HP:0000365] hearing impairment | <i>EDN1</i><br><br>autosomal recessive<br>auriculocondylar syndrome<br>615706      | chr6:12290865<br>NM_001955.4(EDN1):c.3G>C<br>NP_001946.3(EDN1):p. (Met1?)<br>heterozygous missense variant<br>paternal, VOUS          |
| <b>P057<br/>17<br/>Female</b> | SNRS                             | [HP:0000100] nephrotic syndrome<br>biopsy: FSGS biopsy: FSGS                                                  | <i>PLCE1</i><br><br>autosomal recessive nephrotic syndrome, type 3<br>174050       | chr10:96058261<br>NM_016341.3(PLCE1):c.5293G>T<br>NP_057425.3(PLCE1):p.(Ala1765Ser)<br>heterozygous missense variant<br>unknown, VOUS |
| <b>P140<br/>3<br/>Female</b>  | aHUS                             | [HP:0001937]<br>microangiopathic haemolytic anaemia proteinuria<br><br>CKD 1                                  | <i>CFH</i><br><br>autosomal dominant Hemolytic uremic syndrome, atypical<br>235400 | chr1:196711152<br>NM_000186.3(CFH):c.3104G>A<br>NP_000177.2(CFH):p.(Ser1035Asn)<br>Heterozygous, unknown, VOUS                        |

|                               |                  |                                                                                                                                                                                                         |                                                                                                     |                                                                                                                                                  |
|-------------------------------|------------------|---------------------------------------------------------------------------------------------------------------------------------------------------------------------------------------------------------|-----------------------------------------------------------------------------------------------------|--------------------------------------------------------------------------------------------------------------------------------------------------|
| <b>P143<br/>12<br/>Female</b> | CAKUT- syndromic | [HP:0002048] renal cortical atrophy (right)<br>Mild brachydactyly<br>[HP:0004322] short stature<br>[HP:0000505] visual impairment<br>[HP:0000010] recurrent urinary tract infections<br>nephrolithiasis | <i>STXBP1</i><br><br>autosomal dominant STXBP1-related neurodevelopmental disorder                  | chr9:130423447<br>NM_003165.3(STXBP1):c.392C>T<br>NP_003156.1(STXBP1):p.<br>(Thr131Met)<br>heterozygous missense variant<br>unknown, VOUS        |
| <b>P145<br/>12<br/>Female</b> | SRNS             | [HP:0000100] nephrotic syndrome                                                                                                                                                                         | <i>FAT1</i><br><br>FAT1 related nephropathy                                                         | chr4:187557301T>C<br>NM_005245.3(FAT1):c.4061A>G<br>NP_005236.2(FAT1):p.(Glu1354Gly)<br>Heterozygous missense variant<br>unknown, VOUS           |
| <b>P022<br/>42<br/>Female</b> | Nephrolithiasis  | [HP:0000093] proteinuria<br>[HP:0000787] nephrolithiasis<br>[HP:0002901] hypocalcemia                                                                                                                   | <i>SLC34A3</i><br><br>autosomal recessive<br>Hypophosphatemic rickets with hypercalciuria<br>241530 | chr9:140429059<br>NM_001177317.1(SLC34A3):c.1211<br>G>C<br>NP_001170788.1(SLC34A3):p.(Gly404Ala)<br>homozygous missense variant<br>unknown, VOUS |
| <b>P037<br/>35<br/>Female</b> | Alport           | [HP:0000790] hematuria<br>[HP:0000093] proteinuria<br>[HP:0000365] hearing impairment<br>[HP:0100646] thyroiditis                                                                                       | <i>COL4A4</i><br><br>autosomal dominant Hematuria, familial benign<br>141200                        | chr2:227942777<br>NM_000092.4(COL4A4):c.1820C>T<br>NP_000083.3(COL4A4):p.<br>(Ala607Val)<br>heterozygous missense variant<br>unknown, VOUS       |

|                               |                                  |                                                                                                                                                    |                                                                                                                          |                                                                                                                                        |
|-------------------------------|----------------------------------|----------------------------------------------------------------------------------------------------------------------------------------------------|--------------------------------------------------------------------------------------------------------------------------|----------------------------------------------------------------------------------------------------------------------------------------|
| <b>P104<br/>24<br/>Male</b>   | SRNS                             | [HP:0000100] nephrotic syndrome<br>[HP:0012586] bilateral renal atrophy<br>biopsy: FSGS                                                            | <i>CLCN5</i><br><br>X-linked recessive Proteinuria, low molecular weight, with hypercalciuric nephrocalcinosis<br>308990 | chrX:49834543<br>NM_001127899.3(CLCN5):c.173C>T<br>NP_001121371.1(CLCN5):p.(Ser58Leu)<br>hemizygous missense variant<br>unknown, VOUS  |
| <b>P108<br/>50<br/>Female</b> | Buschke-Oloendorff syndrome/MPGN | [HP:0000790] hematuria<br><br>biopsy:membranoproliferative glomerulonephritis<br>[HP:0004319]<br>hypoaldosteronism<br>[HP:0010739] Osteopoikilosis | <i>LRP5</i><br><br>autosomal dominant Osteopetrosis<br>607634                                                            | chr11:68193587G>T<br>NM_002335.2(LRP5):c.3569G>T<br>NP_002326.2(LRP5):p.(Arg1190Leu)<br>Heterozygous missense variant<br>Unknown, VOUS |
| <b>P133<br/>47<br/>Male</b>   | Reflux nephropathy questioned    | [HP:0000093] proteinuria                                                                                                                           | <i>ANLN</i><br><br>autosomal dominant focal segmental glomerulosclerosis 8<br>616032                                     | chr7:36445877<br>NM_018685.4(ANLN):c.575C>G<br>NP_061155.2(ANLN):p.(Ser192Trp)<br>Heterozygous missense variant<br>Unknown, VOUS       |
| <b>P136<br/>33<br/>Female</b> | aHUS                             | HP:0001878 hemolytic anaemia<br>[HP:0000093] proteinuria<br>biopsy: suggestive of haemolytic uraemic syndrome                                      | <i>REN</i><br><br>autosomal dominant hyperuricemic nephropathy, familial juvenile 2<br>613092                            | chr1:204124235<br>NM_000537.3(REN):c.1130C>A<br>NP_000528.1(REN):p.(Pro377His)<br>Heterozygous missense variant<br>Unknown, VOUS       |

|                               |                       |                                                                                     |                                                                                      |                                                                                                                                   |
|-------------------------------|-----------------------|-------------------------------------------------------------------------------------|--------------------------------------------------------------------------------------|-----------------------------------------------------------------------------------------------------------------------------------|
| <b>P181<br/>60<br/>Male</b>   | Genetic FSGS          | renal transplant                                                                    | <i>FN1</i><br><br>Autosomal Dominant<br>Glomerulopathy<br>601894                     | chr2:216236676<br>NM_212482.3(FN1):c.6670A>C<br>NP_997647.1(FN1):p.(Ile2224Leu)<br>Heterozygous missense variant<br>Unknown, VOUS |
| <b>P198<br/>64<br/>Male</b>   | Primary hyperoxaluria | [HP:0000093] proteinuria<br>biopsy:suggestive of calcium<br>oxalate nephrolithiasis | <i>GLA</i><br><br>X-linked Fabry disease<br>301500                                   | chrX:100658816<br>NM_000169.2(GLA):c.352C>T<br>NP_000160.1(GLA):p.(Arg118Cys)<br>Hemizygous missense variant<br>Unknown, VOUS     |
| <b>P003<br/>0<br/>Female</b>  | CAKUT                 | [HP:0005562] multiple renal<br>cysts<br>[HP:0000086] ectopic kidney<br>(R)          | <i>NPHP4</i><br><br>autosomal recessive<br>Nephronophthisis 4<br>606966              | chr1:6046228<br>NM_015102.3(NPHP4):c.122C>T<br>NP_055917.1(NPHP4):p.(Pro41Leu)<br>heterozygous missense variant<br>unknown, VOUS  |
| <b>P014<br/>31<br/>Female</b> | Nephronophthisis      | biopsy:suggestive of chronic<br>tubulointerstitial nephritis                        | <i>UMOD</i><br><br>autosomal dominant Medullary<br>cystic kidney disease 2<br>603860 | chr16:20360508<br>NM_003361.3(UMOD):c.115G>C<br>NP_003352.2(UMOD):p.(Ala39Pro)<br>heterozygous missense variant<br>unknown, VOUS  |

|                               |                  |                                                                                                                     |                                                                                                    |                                                                                                                                          |
|-------------------------------|------------------|---------------------------------------------------------------------------------------------------------------------|----------------------------------------------------------------------------------------------------|------------------------------------------------------------------------------------------------------------------------------------------|
| <b>P149<br/>11<br/>Male</b>   | Alport           | [HP:0000790] hematuria                                                                                              | <i>COL4A1</i><br><br>autosomal dominant COL4A1-related disease<br>611773                           | chr13:110817302<br>NM_001845.6(COL4A1):c.4057G>A<br>NP_001836.3(COL4A1):p.(Asp1353Asn)<br>heterozygous missense variant<br>unknown, VOUS |
| <b>P147<br/>6<br/>Female</b>  | Nephrocalcinosis | [HP:0000121] nephrocalcinosis<br>[HP:0000407] sensorineural hearing impairment<br>[HP:0005562] multiple renal cysts | <i>ADCY10</i><br><br>autosomal dominant<br>Hypercalciuria, absorptive, susceptibility to<br>143870 | chr1:167793897<br>NM_018417.5(ADCY10):c.9747T>C<br>NP_060887.2(ADCY10):p.(Ile316Thr)<br>heterozygous missense variant<br>unknown, VOUS   |
| <b>P018<br/>40<br/>Female</b> | FSGS             | [HP:0000093] proteinuria                                                                                            | <i>CUBN</i><br><br>Autosomal Recessive<br>Megaloblastic anemia-1, Finnish type<br>261100           | chr10:17145204<br>NM_001081.3(CUBN):c.1450A>G<br>NP_001072.2(CUBN):p.(Ser484Gly)<br>heterozygous missense variant<br>unknown, VOUS       |
| <b>P019<br/>50<br/>Male</b>   | FSGS             | [HP:0000093] proteinuria<br>biopsy: suggestive of FSGS                                                              | <i>COL4A1</i><br><br>autosomal dominant COL4A1-related disease<br>611773                           | chr13:110839607<br>NM_001845.4(COL4A1):c.1606G>A<br>NP_001836.2(COL4A1):p.(Asp536Asn)<br>heterozygous missense variant<br>unknown, VOUS  |

|                               |       |                                                       |                                                                                                                      |                                                                                                                                              |
|-------------------------------|-------|-------------------------------------------------------|----------------------------------------------------------------------------------------------------------------------|----------------------------------------------------------------------------------------------------------------------------------------------|
| <b>P021<br/>58<br/>Male</b>   | ADTKD | [HP:0000790] hematuria<br>bilateral small kidneys     | <i>BICC1</i><br><br>autosomal dominant Renal<br>dysplasia, cystic, susceptibility to<br>601331                       | chr10:6046815<br>NM_001080512.1(BICC1):c.520A>T<br>NP_001073981.1(BICC1):p.(Asn174T<br>yr)<br>heterozygous missense variant<br>unknown, VOUS |
| <b>P043<br/>58<br/>Female</b> | FSGS  | [HP:0000093] proteinuria<br>biopsy: FSGS biopsy: FSGS | <i>MYO1E</i><br><br>autosomal recessive<br>Glomerulosclerosis, focal<br>segmental, 6<br>614131                       | chr15:59510161<br>NM_004998.3(MYO1E):c.1036G>C<br>NP_004989.2(MYO1E):p.(Glu346Gln)<br>heterozygous missense variant<br>unknown, VOUS         |
| <b>P059<br/>28<br/>Female</b> | ARPKD | [HP:0005562] multiple renal<br>cysts                  | <i>PKHD1</i><br><br>autosomal recessive polycystic<br>kidney disease 4, with or without<br>hepatic disease<br>263200 | chr6:51935804<br>NM_138694.3(PKHD1):c.667G>A<br>NP_619639.3(PKHD1):p.(Gly223Ser)<br>heterozygous missense variant<br>unknown, LP             |
| <b>P060<br/>36<br/>Male</b>   | aHUS  | [HP:0001878] hemolytic<br>anaemia                     | <i>C3</i><br><br>autosomal dominant Hemolytic<br>uremic syndrome, atypical,<br>susceptibility to, 5<br>612925        | chr19:6697742<br>NM_000064.2(C3):c.2504T>C<br>NP_000055.2(C3):p.(Leu835Pro)<br>heterozygous missense variant<br>unknown, VOUS                |
| <b>P107<br/>27<br/>Male</b>   | FSGS  | [HP:0000100] nephrotic<br>syndrome                    | <i>FAT1</i><br><br>FAT1 related nephropathy                                                                          | chr4:187630855<br>NM_005245.3(FAT1):c.127G>A<br>NP_005236.2(FAT1):pm(Val43Met)<br>heterozygous missense variant<br>unknown, VOUS             |

|                               |                       |                                                                                                                                                                                                                                                                |                                                                                                                                                                                               |                                                                                                                                                   |
|-------------------------------|-----------------------|----------------------------------------------------------------------------------------------------------------------------------------------------------------------------------------------------------------------------------------------------------------|-----------------------------------------------------------------------------------------------------------------------------------------------------------------------------------------------|---------------------------------------------------------------------------------------------------------------------------------------------------|
| <b>P111<br/>54<br/>Female</b> | FSGS                  | bilateral small kidneys                                                                                                                                                                                                                                        | <i>SLC3A1</i><br><br>cystinuria<br>220100                                                                                                                                                     | chr2:44547720<br>NM_000341.3(SLCVOUS1):c.2000T><br>C<br>NP_000332.2(SLCVOUS1):p.(Phe66<br>7Ser)<br>heterozygous missense variant<br>unknown, VOUS |
| <b>P113<br/>30<br/>Female</b> | Cystic Kidney Disease | [HP:0005562] multiple renal<br>cysts                                                                                                                                                                                                                           | <i>PKD1</i><br><br>autosomal dominant<br>Polycystic kidney disease 1<br>173900                                                                                                                | chr16:2142549<br>NM_001009944.2(PKD1):c.11201A><br>G<br>NP_001009944.2(PKD1):p.(Tyr3734C<br>ys)<br>heterozygous missense variant<br>unknown, VOUS |
| <b>P012<br/>15<br/>Male</b>   | Unknown               | [HP:0005562] multiple renal<br>cysts<br>[HP:0001256] Intellectual<br>disability, mild<br>[HP:0000508] ptosis<br>[HP:0000316] hypertelorism<br>[HP:0002808] kyphosis<br>[HP:0100360] contractures<br>upper limbs<br>[HP:0001654] abnormality of<br>heart valves | <i>FLNA</i><br><br>X-linked dominant Otopalatodigital<br>syndrome types I and II; X-linked<br>recessive Cardiac valvular<br>dysplasia and Frontometaphyseal<br>dysplasia 1, and FG syndrome 2 | chrX:153585855<br>NM_001456.3(FLNA):c.4892C>T<br>NP_001447.2(FLNA):p.(Pro1631Leu)<br>hemizygous missense variant<br>maternal, VOUS                |



|                               |         |                                                                                                                                                                                                                                                     |                                                                                                                                      |                                                                                                                                          |
|-------------------------------|---------|-----------------------------------------------------------------------------------------------------------------------------------------------------------------------------------------------------------------------------------------------------|--------------------------------------------------------------------------------------------------------------------------------------|------------------------------------------------------------------------------------------------------------------------------------------|
| <b>P056<br/>19<br/>Female</b> | Unknown | [HP:0000003] multicystic kidney dysplasia<br>[HP:0000121] nephrocalcinosis<br>[HP:0002650] scoliosis<br>[HP:0002091] restrictive lung disease<br>[HP:0003701] proximal muscle weakness<br>[HP:0002917] hypomagnesemia<br>[HP:0003159] hyperoxaluria | <i>MED13L</i><br><br>autosomal dominant Mental retardation and distinctive facial features with or without cardiac defects<br>616789 | chr12:116409906<br>NM_015335.4(MED13L):c.5867A>T<br>NP_056150.1(MED13L):p.(Gln1956Leu)<br>heterozygous missense variant<br>unknown, VOUS |
|                               |         |                                                                                                                                                                                                                                                     | <i>GJB2</i><br><br>autosomal dominant Mental retardation and distinctive facial features with or without cardiac defects<br>616789   | chr13:20763650<br>NM_004004.5(GJB2):c.71G>A<br>NP_003995.2(GJB2):p.(tryp24Ter)<br>heterozygous missense variant<br>unknown, P            |
| <b>P112<br/>24<br/>Male</b>   | SRNS    | [HP:0000089] hyperechogenic kidneys<br>[HP:0000100] nephrotic syndrome<br>biopsy: FSGS                                                                                                                                                              | <i>INF2</i><br><br>autosomal dominant glomerulosclerosis, focal segmental, 5<br>613237                                               | chr14:105169723<br>NM_022489.3(INF2):c.599T>G<br>NP_071934.3(INF2):p.(Val200Gly)<br>Heterozygous missense variant<br>Unknown, VOUS       |
|                               |         |                                                                                                                                                                                                                                                     | <i>CLCNKB</i><br><br>autosomal recessive Bartter syndrome, type 3<br>607364                                                          | chr1:16378296<br>NM_000085.4(CLKNKB):c.1389delA<br>NP_000076.2(CLKNKB):p.(Tyr466Metfs*13)<br>Heterozygous nonsense variant<br>Unknown, P |
|                               |         |                                                                                                                                                                                                                                                     |                                                                                                                                      | chr1:16373036<br>NM_000085.4(CLKNKB):c.236A>G<br>NP_000076.2(CLKNKB):p.(Gln79Arg)<br>Heterozygous missense variant<br>Unknown, VOUS      |

|                              |                                 |                                                                                                                                   |                                                                                                           |                                                                                                                                           |
|------------------------------|---------------------------------|-----------------------------------------------------------------------------------------------------------------------------------|-----------------------------------------------------------------------------------------------------------|-------------------------------------------------------------------------------------------------------------------------------------------|
| <b>P080<br/>10<br/>Male</b>  | Cystic Kidney Disease-syndromic | [HP:0005562] multiple renal cysts                                                                                                 | <i>PKHD1</i>                                                                                              | chr6:51889738<br>NM_138694.3(PKHD1):c.4870C>T<br>NP_619639.3(PKHD1):p.(Arg1624Trp)                                                        |
|                              |                                 | [HP:0006136] Bilateral postaxial polydactyly<br>[HP:0002342] intellectual disability, moderate<br>[HP:0000365] hearing impairment | autosomal recessive polycystic kidney disease 4, with or without hepatic disease<br>263200                | )<br>Heterozygous missense variant<br>unknown, P                                                                                          |
|                              |                                 | [HP:0001541] ascites<br>[HP:0004383] hypoplastic left heart<br>[HP:0004469] chronic bronchitis                                    | <i>CUL7</i><br>autosomal recessive polycystic kidney disease 4, with or without hepatic disease<br>263200 | chr6:43011367<br>NM_014780.4(CUL7):c.3173-3_3174delTAGAT<br>Heterozygous deletion variant<br>unknown, LP                                  |
|                              |                                 |                                                                                                                                   | <i>SDCCAG8</i><br>autosomal recessive Bardet-Biedl syndrome.<br>615993                                    | chr1:243542101<br>NM_006642.4(SDCCAG8):c.1552A>G,<br>NP_006633.1(SDCCAG8):p.(Arg518Gly)<br>Heterozygous missense variant<br>unknown, VOUS |
| <b>P154<br/>9<br/>Female</b> | Alport                          | [HP:0000790] hematuria<br>[HP:0000093] proteinuria<br>US consistent with nutcracker syndrome                                      | <i>FAT1</i><br>FAT1 related nephropathy                                                                   | chr4:187540085<br>NM_005245.4(FAT1):c.7655A>G<br>NP_005236.2(FAT1):p.(Glu2552Gly)<br>Heterozygous missense variant<br>unknown, VOUS       |
|                              |                                 |                                                                                                                                   |                                                                                                           | chr4:187630099<br>NM_005245.4(FAT1):c.883G>A<br>NP_005236.2(FAT1):p.(Val295Met)<br>Heterozygous missense variant<br>unknown, VOUS         |

|                                           |                    |                                                                                       |                                                                        |                                                                                                                                              |
|-------------------------------------------|--------------------|---------------------------------------------------------------------------------------|------------------------------------------------------------------------|----------------------------------------------------------------------------------------------------------------------------------------------|
| <b>P033</b><br><b>20</b><br><b>Female</b> | Unknown            | [HP:0000089]<br>hyperechogenic kidneys                                                | <i>COL4A1</i>                                                          | chr13:110804732<br>NM_001845.4(COL4A1):c.4877C>G<br>NP_001836.2(COL4A1):p.<br>(Ala1626Gly)<br>Heterozygous missense variant<br>Unknown, VOUS |
|                                           |                    |                                                                                       | autosomal dominant COL4A1-<br>related disease<br>611773                |                                                                                                                                              |
|                                           |                    |                                                                                       | <i>MYH9</i>                                                            | chr22:36690158<br>NM_002473.4(MYH9):c.3817G>A<br>NP_002464.1(MYH9):p.<br>(Asp1273Asn)<br>Heterozygous missense variant<br>Unknown, VOUS      |
|                                           |                    |                                                                                       | autosomal dominant MYH9 related<br>disease<br>155100                   |                                                                                                                                              |
| <b>P011</b><br><b>43</b><br><b>Male</b>   | Familial nephritis | [HP:0000822] hypertension<br>[HP:0000365] hearing<br>impairment                       | <i>UMOD</i>                                                            | chr16:20360360<br>NM_003361.3(UMOD):c.263G>A<br>NP_003352.2(UMOD):p.(Gly88Asp)<br>heterozygous missense variant<br>unknown, VOUS             |
|                                           |                    |                                                                                       | autosomal dominant Medullary<br>cystic kidney disease 2<br>603860      |                                                                                                                                              |
|                                           |                    |                                                                                       | <i>MYH9</i>                                                            | chr22:36688151<br>NM_002473.4(MYH9):c.4225G>A<br>NP_002464.1(MYH9):p.(Asp1409Asn<br>)<br>heterozygous missense variant<br>unknown, VOUS      |
|                                           |                    |                                                                                       | autosomal dominant Medullary<br>cystic kidney disease 2<br>603860      |                                                                                                                                              |
| <b>P116</b><br><b>14</b><br><b>Female</b> | Alport             | [HP:0000100] nephrotic<br>syndrome<br>biopsy: suggestive of<br>minimal change disease | <i>CFHR5</i>                                                           | chr1:196973872G>A<br>NM_030787.3(CFHR5):c.1412G>A<br>NP_110414.1(CFHR5):p.(Gly471Glu)<br>heterozygous missense variant<br>unknown, VOUS      |
|                                           |                    |                                                                                       | autosomal dominant<br>Nephropathy due to CFHR5<br>deficiency<br>614809 |                                                                                                                                              |
|                                           |                    |                                                                                       | <i>INF2</i>                                                            | chr14:105180740G>C<br>NM_022489.3(INF2):c.3241G>C<br>NP_071934.3(INF2):p.(Asp1081His)<br>heterozygous missense variant<br>unknown, VOUS      |
|                                           |                    |                                                                                       | autosomal dominant<br>Nephropathy due to CFHR5<br>deficiency<br>614809 |                                                                                                                                              |

|                               |                       |                                                                                     |               |                                                                                                                                             |
|-------------------------------|-----------------------|-------------------------------------------------------------------------------------|---------------|---------------------------------------------------------------------------------------------------------------------------------------------|
| <b>P053<br/>2<br/>Female</b>  | Cystic Kidney Disease | [HP:0005562] multiple renal cysts<br>[HP:0001903] anemia                            | <i>PRKCSH</i> | chr19:11560096<br>NM_002743.2(PRKCSH):c.1456G>A<br>NP_002734.2(PRKCSH):p.<br>(Gly486Arg)<br>Heterozygous missense variant<br>paternal, VOUS |
|                               |                       |                                                                                     | <i>SLIT2</i>  | chr4:20535203<br>NM_004787.3(SLIT2):c.1697G>A<br>NP_004778.1(SLIT2):p.(Ser566Asn)<br>Heterozygous missense variant<br>unknown, VOUS         |
| <b>P163<br/>37<br/>Female</b> | SRNS                  | [HP:0000100] nephrotic syndrome                                                     | <i>LAMA5</i>  | chr20:60887790<br>NM_005560.5(LAMA5):c.9125G>A<br>(NP_005551.3(LAMA5):p.(Arg3042His))<br>Heterozygous missense variant<br>Unknown, VOUS     |
|                               |                       |                                                                                     | <i>INF2</i>   | chr14:105169767<br>NM_022489.3(INF2):c.643A>C<br>NP_071934.3(INF2):p.(Thr215Pro)<br>Heterozygous missense variant<br>Unknown, VOUS          |
| <b>P010<br/>17<br/>Female</b> | Cystic Kidney Disease | bilateral small kidneys<br>[HP:0001513] obesity<br>[HP:0000833] glucose intolerance | <i>TTC21B</i> | chr2:166740416<br>NM_024753.4(TTC21B):c.3572T>C<br>NP_079029.3(TTC21B):p.<br>(Ile1191Thr)<br>Heterozygous missense variant<br>Unknown, VOUS |
|                               |                       |                                                                                     | <i>CSPP1</i>  | chr8:68049694<br>NM_024790.6(CSPP1):c.1816C>T<br>NP_079066.5(CSPP1):p.(Arg606Trp)<br>Heterozygous missense variant<br>Unknown, VOUS         |

|                               |                                       |                                                                                          |                                                                                                                                                                |                                                                                                                                                                                                                                                                                                                                                                                                                 |
|-------------------------------|---------------------------------------|------------------------------------------------------------------------------------------|----------------------------------------------------------------------------------------------------------------------------------------------------------------|-----------------------------------------------------------------------------------------------------------------------------------------------------------------------------------------------------------------------------------------------------------------------------------------------------------------------------------------------------------------------------------------------------------------|
| <b>P168<br/>60<br/>Female</b> | Familial Mediterranean fever,<br>FSGS | [HP:0000790] hematuria<br>[HP:0000093] proteinuria<br>[HP:0001955] unexplained<br>fevers | <i>MEFV</i><br><br>autosomal recessive familial<br>Mediterranean fever<br>249100                                                                               | chr16:3304567<br>NM_000243.2(MEFV):c.501G>C<br>NP_000234.1(MEFV):p.(Glu167Asp)<br>Heterozygous missense variant<br>Unknown, LP<br><br>chr16:3297166<br>NM_000243.2(MEFV):c.1437C>G<br>NP_000234.1(MEFV):p.(Phe479Leu)<br>Heterozygous missense variant<br>Unknown, VOUS<br><br>chr16:3304380<br>NM_000243.2(MEFV):c.688G>A<br>NP_000234.1(MEFV):p.(Glu230Lys)<br>Heterozygous missense variant<br>Unknown, VOUS |
| <b>P039<br/>16<br/>Male</b>   | Alport                                | [HP:0000790] hematuria                                                                   | <i>COL4A3</i><br><br>autosomal dominant Alport<br>syndrome 3<br>104200<br><br><i>DHCR7</i><br><br>autosomal recessive Smith-Lemli-<br>Opitz syndrome<br>270400 | chr2:228155601<br>NM_000091.4(COL4A3):c.3209C>A<br>NP_000082.2(COL4A3):p.(Thr1070Lys)<br>heterozygous missense variant<br>unknown, VOUS<br><br>chr11:71146886<br>NM_001360.2(DHCR7):c.964-1G>C,<br>heterozygous splice site variant<br>unknown, P                                                                                                                                                               |
| <b>P058<br/>54<br/>Male</b>   | FSGS                                  | [HP:0000093] proteinuria<br>[HP:0012586] bilateral renal<br>atrophy                      | <i>PKHD1</i><br><br>autosomal recessive polycystic<br>kidney disease 4, with or without<br>hepatic disease<br>263200                                           | chr6:51923153<br>NM_138694.3(PKHD1):c.1480C>T<br>NP_619639.3(PKHD1):p.(Arg494*)<br>heterozygous nonsense variant<br>unknown, P                                                                                                                                                                                                                                                                                  |

|                               |      |                                                                                                                                                            |                                                                                                                                             |                                                                                                                                                                                                                                                                                      |
|-------------------------------|------|------------------------------------------------------------------------------------------------------------------------------------------------------------|---------------------------------------------------------------------------------------------------------------------------------------------|--------------------------------------------------------------------------------------------------------------------------------------------------------------------------------------------------------------------------------------------------------------------------------------|
| <b>P180<br/>20<br/>Female</b> | MCKD | [HP:0005562] multiple renal cysts<br>[HP:0000089] hyperechogenic kidneys<br>[HP:0000093] proteinuria<br>biopsy:features of medullary cystic kidney disease | <i>PKHD1</i><br><br>autosomal recessive polycystic kidney disease 4, with or without hepatic disease<br>263200                              | chr6:51923256_51923257delinsG<br>NM_138694.3(PKHD1):c.1376fdelinsG<br>NP_619639.3(PKHD1):p.(His459Argfs*3)<br>heterozygous nonsense variant<br>unknown, LP<br><br>chr6:51915018<br>NM_138694.3(PKHD1):c.2216C>T<br>NP_619639.3(PKHD1):p.(Pro739Leu)<br>heterozygous<br>unknown, VOUS |
| <b>P062<br/>47<br/>Female</b> | FSGS | [HP:0000093] proteinuria                                                                                                                                   | <i>CUBN</i><br><br>Autosomal Recessive<br>Megaloblastic anemia-1, Finnish type<br>261100<br><br><i>FAT1</i><br><br>FAT1 related nephropathy | chr10:16948208<br>NM_001081.3(CUBN):c.7906C>T<br>NP_001072.2(CUBN):p.(Arg26236*)<br>heterozygous nonsense variant<br>unknown, LP<br><br>chr4:187519198<br>NM_005245.3(FAT1):c.12185T>G<br>NP_005236.2(FAT1):p.(Leu4062Arg)<br>heterozygous missense variant<br>unknown, VOUS         |
| <b>P083<br/>42<br/>Male</b>   | MCKD | bilateral small kidneys                                                                                                                                    | <i>NPHS2</i><br><br>autosomal recessive Nephrotic syndrome, type 2<br>600995                                                                | chr1:179521755<br>NM_014625.3(NPHS2):c.855_856del<br>NP_055440.1(NPHS2):p.(Arg286Thrfs*17)<br>heterozygous nonsense variant<br>unknown, P<br><br>chr1:179526214<br>NM_014625.3(NPHS2):c.686G>A<br>NP_055440.1(NPHS2):p.(Arg229Gln)<br>heterozygous missense variant<br>unknown, VOUS |

|                                           |                  |                                                                                                                                                                                                                                                      |                                                                                                |                                                                                                                                                              |                                                                                                                                                            |
|-------------------------------------------|------------------|------------------------------------------------------------------------------------------------------------------------------------------------------------------------------------------------------------------------------------------------------|------------------------------------------------------------------------------------------------|--------------------------------------------------------------------------------------------------------------------------------------------------------------|------------------------------------------------------------------------------------------------------------------------------------------------------------|
| <b>P095</b><br><b>32</b><br><b>Female</b> | Podocytopathy    | [HP:0000093] proteinuria<br>biopsy: suggestive of thin<br>basement membrane<br>disease                                                                                                                                                               | <i>FAT1</i>                                                                                    | chr4:187510197<br>NM_005245.3( <i>FAT1</i> ):c.13316delC<br>NP_005236.2( <i>FAT1</i> ):p.(Pro4439Glnfs*48)<br>Heterozygous nonsense variant<br>Unknown, VOUS |                                                                                                                                                            |
|                                           |                  |                                                                                                                                                                                                                                                      | <i>FN1</i>                                                                                     | chr2:216269303<br>NM_212482.1( <i>FN1</i> ):c.3062G>A<br>NP_997647.1( <i>FN1</i> ):p.(Arg1021Gln)<br>Heterozygous missense variant<br>Unknown, VOUS          |                                                                                                                                                            |
| <b>P079</b><br><b>9</b><br><b>Male</b>    | CAKUT- syndromic | [HP:0000122] unilateral renal<br>agenesis<br>[HP:0000110] renal dysplasia<br>[HP:0005111] dilatation of<br>the ascending aorta<br>[HP:0010442] polydactyly<br>[HP:0002808] kyphosis<br>[HP:0001476] delayed<br>closure of the anterior<br>fontanelle | <i>TTC21B</i>                                                                                  | chr2:166764256<br>NM_024753.5( <i>TTC21B</i> ):c.2500C>T<br>NP_079029.3( <i>TTC21B</i> ):p.(Gln834*)<br>Heterozygous<br>Unknown, P                           |                                                                                                                                                            |
|                                           |                  |                                                                                                                                                                                                                                                      | autosomal recessive short-rib<br>thoracic dysplasia 4 with or without<br>polydactyly<br>613819 | <i>MED12</i>                                                                                                                                                 | chrX:70361764<br>NM_005120.3( <i>MED12</i> ):c.6440A>G<br>NP_005111.2( <i>MED12</i> ):p.(Gln2147Arg<br>)<br>hemizygous missense variant<br>Unknown, VOUS   |
|                                           |                  |                                                                                                                                                                                                                                                      | autosomal recessive short-rib<br>thoracic dysplasia 4 with or without<br>polydactyly<br>613819 | <i>TBX18</i>                                                                                                                                                 | chr6:85466472<br>NM_001080508.3( <i>TBX18</i> ):c.715G>A<br>NP_001073977.1( <i>TBX18</i> ):p.(Val239Ile)<br>Heterozygous missense variant<br>Unknown, VOUS |

|                                           |                       |                                                                                            |               |                                                                                                                                                            |
|-------------------------------------------|-----------------------|--------------------------------------------------------------------------------------------|---------------|------------------------------------------------------------------------------------------------------------------------------------------------------------|
| <b>P069</b><br><b>18</b><br><b>Female</b> | Nephronophthisis      | [HP:0000093] proteinuria<br>[HP:0000556] retinal dystrophy<br>biopsy: non specific changes | <i>CEP290</i> | chr12:88514913_88514914del<br>NM_025114.3(CEP290):c.1219_1220del<br>NP_079390.3(CEP290):p.(Met407Glu fs*14)<br>heterozygous nonsense variant<br>unknown, P |
|                                           |                       |                                                                                            | <i>CEP250</i> | chr20:34092055<br>NM_007186.5(CEP250):c.5858G>A<br>NP_009117.2(CEP250_i001):p.(Arg1953Gln)<br>heterozygous missense variant<br>unknown, VOUS               |
|                                           |                       |                                                                                            | <i>CEP250</i> | chr20:34096837<br>NM_007186.5(CEP250):c.6972G>C<br>NP_009117.2(CEP250):p.(Glu2324Asp)<br>heterozygous missense variant<br>unknown, VOUS                    |
| <b>P124</b><br><b>15</b><br><b>Female</b> | ADPKD                 | [HP:0005562] multiple renal cysts<br>[HP:0000105] enlarged kidneys                         | <i>PKD2</i>   | chr4:88940729<br>NM_000297.4(PKD2):c.709+6T>G<br>heterozygous<br>unknown, VOUS                                                                             |
| <b>P202</b><br><b>8</b><br><b>Male</b>    | Cystic kidney disease | [HP:0005562] multiple renal cysts<br>[HP:0000790] hematuria                                | <i>HNF1B</i>  | chr17:36047399<br>NM_000458.4(HNF1B):c.1654-4G>A<br>heterozygous splice site variant<br>unknown, VOUS                                                      |



|                             |                          |                                             |                                                                                      |                                                                                         |
|-----------------------------|--------------------------|---------------------------------------------|--------------------------------------------------------------------------------------|-----------------------------------------------------------------------------------------|
| <b>P051<br/>56<br/>Male</b> | Renal Cysts and Diabetes | [HP:0005562] multiple renal cysts           | <i>PKD1</i>                                                                          | chr16:2156087<br>NM_001009944.2(PKD1):c.7703+5G>T                                       |
|                             |                          | [HP:0000105] enlarged kidneys               | autosomal dominant Polycystic kidney disease 1<br>173900                             | heterozygous splice site variant<br>unknown, VOUS                                       |
|                             |                          |                                             | <i>MUC1</i>                                                                          | chr16:2140926<br>NM_001100994.2(PKD1):c.11962C>T<br>NP_001009944.2(PKD1):p.(Arg3988Cys) |
|                             |                          | Medullary cystic kidney disease 1<br>174000 | heterozygous missense variant<br>unknown, VOUS                                       |                                                                                         |
|                             |                          |                                             | chr1:155162053<br>NM_001204286.1(MUC1):c.107C>T<br>NP_001191215.1(MUC1):p.(Ala36Val) | heterozygous missense variant<br>unknown, VOUS                                          |
| <b>P159<br/>64<br/>Male</b> | Unknown                  | [HP:0000093] proteinuria                    | <i>COL4A3</i>                                                                        | chr2:228149062<br>NM_000091.4(COL4A3):c.2881+1G>A                                       |
|                             |                          |                                             | autosomal dominant Alport syndrome 3<br>104200                                       | heterozygous splice site variant<br>unknown, VOUS                                       |
|                             |                          |                                             | <i>ACTN4</i>                                                                         | chr19:39216428<br>NM_004924.6(ACTN4):c.2075A>G<br>NP_004915.2(ACTN4):p.(Gln692Arg)      |
|                             |                          |                                             | Glomerulosclerosis, focal segmental, 1<br>603278                                     | heterozygous missense variant<br>unknown, VOUS                                          |

|                                           |                        |                                                                                                       |                                                                                                                                                                      |                                                                                                                                                                                                                                                                                                                                                                                |
|-------------------------------------------|------------------------|-------------------------------------------------------------------------------------------------------|----------------------------------------------------------------------------------------------------------------------------------------------------------------------|--------------------------------------------------------------------------------------------------------------------------------------------------------------------------------------------------------------------------------------------------------------------------------------------------------------------------------------------------------------------------------|
| <b>P110</b><br><b>33</b><br><b>Female</b> | Minimal Change Disease | [HP:0000790] hematuria<br>[HP:0000093] proteinuria<br>biopsy: suggestive of<br>minimal change disease | <i>LAMA5</i><br><br>autosomal recessive LAMA5-<br>associated nephrotic syndrome<br><br><br><i>FN1</i><br><br>Glomerulopathy with fibronectin<br>deposits 2<br>601894 | chr20:60890080<br>NM_005560.4(LAMA5):c.8047+4C>T<br>heterozygous splice site variant<br>unknown, VOUS<br><br>NM_005560.4(LAMA5):c.149VOUS><br>T<br>NP_005551.3(LAMA5):p/(Ala498Val)<br>heterozygous missense variant<br>unknown, VOUS<br><br>chr2:216252994<br>NM_212482.2(FN1):c.4283G>A<br>NP_997647.1(FN1):p.(Ser1428Asn)<br>heterozygous missense variant<br>unknown, VOUS |
| <b>P031</b><br><b>36</b><br><b>Female</b> | Hereditary nephritis   | [HP:0000093] proteinuria<br>biopsy: features consistent<br>with MCD                                   | <i>HNF1B</i>                                                                                                                                                         | chr17:36091705_36091707dup<br>NM_000458.4(HNF1B):c.924_926dup<br>ATT<br>NP_000449.1(HNF1B):p.<br>(Ala308_Phe309insLeu)<br>Heterozygous insertion variant<br>Unknown, VOUS                                                                                                                                                                                                      |

Supplementary Table S4. Multivariable logistic regression analysis of baseline clinical factors of patients

|                                                                               | <b>Odds Ratio</b> | <b>95% Confidence Interval</b> | <b>P value</b> |
|-------------------------------------------------------------------------------|-------------------|--------------------------------|----------------|
| <b>Age category</b>                                                           |                   |                                |                |
| < 1 year                                                                      | 9.06              | 2.90-28.26                     |                |
| 1-17 years                                                                    | 2.75              | 1.21-6.24                      |                |
| 18-30 years                                                                   | 0.53              | 0.20-1.44                      |                |
| >30 years                                                                     | (ref)             |                                | <0.001         |
| <b>Family history</b>                                                         | 2.43              | 1.21-4.84                      | 0.01           |
| <b>Female sex</b>                                                             | 1.74              | 0.93-3.25                      | 0.08           |
| <b>Extra-renal manifestations</b>                                             | 0.77              | 0.37-1.60                      | 0.48           |
| <b>Parental consanguinity</b>                                                 | 1.04              | 0.27-4.00                      | 0.96           |
| Age category: age at first presentation to nephrology                         |                   |                                |                |
| Family history: at least 1 first or second degree relative with renal disease |                   |                                |                |
| ref: reference group                                                          |                   |                                |                |
| Parental consanguinity: self-reported                                         |                   |                                |                |

Supplementary table S5: Additional positive diagnoses through the renal genetics clinic which did not count towards the diagnostic yield of whole exome sequencing for kidney disease.

| ID, Age, Sex        | Referral diagnosis                       | Presenting features, CKD stage, HPO term                                                                                                                                                                                 | ES result                                                            | Gene, Genetic diagnosis, OMIM No.                      | Mutation description                                                                                                                                                                                                                                                                                          | Clinical Course                                                                                                                                      |
|---------------------|------------------------------------------|--------------------------------------------------------------------------------------------------------------------------------------------------------------------------------------------------------------------------|----------------------------------------------------------------------|--------------------------------------------------------|---------------------------------------------------------------------------------------------------------------------------------------------------------------------------------------------------------------------------------------------------------------------------------------------------------------|------------------------------------------------------------------------------------------------------------------------------------------------------|
| P122<br>4<br>Female | Nephrotic syndrome - syndromic           | [HP:0000100] nephrotic syndrome<br>[HP:0000089] hyperechogenic kidneys<br>[HP:0000268] scaphocephaly<br>[HP:0002863] myelodysplasia<br>[HP:0004322] short stature<br>[HP:0000405] conductive hearing impairment<br><br>1 | Mendeliome analysed, diagnostic but does not explain renal phenotype | <i>SAMD9</i><br><br>AD Mirage Syndrome<br>617053       | chr7:92732907<br>NM_017654.3( <i>SAMD9</i> ):c.2504G>C<br>NP_060124.2( <i>SAMD9</i> ):p.(Cys835Ser)<br>heterozygous missense variant, de novo, LP<br><br>chr7:92731354<br>NM_017654.3( <i>SAMD9</i> ):c.4057A>G<br>NP_060124.2( <i>SAMD9</i> ):p.(Lys1353Glu)<br>heterozygous missense variant, de novo, VOUS | No result for kidney disease, but explains bone marrow failure - for recruitment to separate functional research for genomic cause of kidney disease |
| P132<br>39<br>Male  | Nephrocalcinosis, interstitial nephritis | [HP:0000093] proteinuria biopsy: consistent with tubulointerstitial nephritis secondary to mushroom poisoning                                                                                                            | no diagnosis on ES but pathogenic change in CMA found                | <i>CLCN5</i><br><br>XLR Dent Disease Complex<br>300009 | arr[hg19]Xp11.23p11.22(49,799,998-49,862,832)x0<br><br>CNV                                                                                                                                                                                                                                                    | CMA and ES ordered concurrently. No changes to current management, maternal aunt advised to have testing as has grand children.                      |

|                    |                     |                                                                                                                                                                                                                   |                                                                                                                                |                                                                                                                           |                                                                                                                                                                                          |                                                                                                                   |
|--------------------|---------------------|-------------------------------------------------------------------------------------------------------------------------------------------------------------------------------------------------------------------|--------------------------------------------------------------------------------------------------------------------------------|---------------------------------------------------------------------------------------------------------------------------|------------------------------------------------------------------------------------------------------------------------------------------------------------------------------------------|-------------------------------------------------------------------------------------------------------------------|
| P064<br>1<br>Male  | Nephronophthisis    | renal hypoplasia [HP:0005562]<br>multiple renal cysts [HP:0000089]<br>hyperechogenic kidneys [HP:0000093]<br>proteinuria [HP:0002240]<br>hepatomegaly [HP:0001903]<br>anaemia [HP:0002904]<br>hyperbilirubinaemia | CMA result showed HNF1B, given extra renal manifestations that were still unexplained by renal diagnosis, Mendeliome analyzed. | <i>UGT1A1</i><br><br>AR crigler-najjar syndrome 218800<br><br><i>HNF1B</i><br>AD Renal cysts and diabetes syndrome 137920 | chr2:234681059<br>NM_000463.2(UGT1A1):c.1456T>G<br>NP_000454.1(UGT1A1):p.(Tyr486Asp)<br>homozygous missense variant, unknown, P<br><br>arr[GRCh37] 17q12(34841209_36352447)x1<br><br>CNV | Surveillance for diabetes, segregation in parents recommended. Parents and sibling referred for renal ultrasound. |
| P098<br>24<br>Male | FSGS versus Alports | [HP:0000093]<br>proteinuria [HP:0001249]<br>intellectual disability [HP:0001513]<br>obesity [HP:0000256]<br>macrocephaly                                                                                          | CMA initially performed, explaining extra-renal features, ES subsequently performed; non diagnostic                            | 1611.2<br>microdeletion syndrome                                                                                          | arr[GRCh37]<br>16p11.2(28455418_29186561)x1,16p11.2(29652488_30332561)x1<br><br>CNV                                                                                                      | Explains other features but not renal phenotype, no changes to current management                                 |

|                    |                          |                                                                                   |                                                       |                                                                          |                                                                                                                                       |                                                                                              |
|--------------------|--------------------------|-----------------------------------------------------------------------------------|-------------------------------------------------------|--------------------------------------------------------------------------|---------------------------------------------------------------------------------------------------------------------------------------|----------------------------------------------------------------------------------------------|
| P146<br>12<br>Male | Cystic kidney<br>disease | [HP:0005562]<br>multiple renal<br>cysts<br>[HP:0002904]<br>hyperbilirubine<br>mia | diagnostic but does not<br>explain renal<br>phenotype | <i>SLC4A1</i><br><br>AD hereditary<br>spherocytosis,<br>type 4<br>612653 | chr17:42336894<br>NM_000342.4(SLC4A1):c.665delC<br>NP_000333.1(SLC4A1):p.(Pro222Argfs*9)<br>heterozygous nonsense variant, unknown, P | no changes to current<br>management, father with<br>similar symptoms referred for<br>testing |
|--------------------|--------------------------|-----------------------------------------------------------------------------------|-------------------------------------------------------|--------------------------------------------------------------------------|---------------------------------------------------------------------------------------------------------------------------------------|----------------------------------------------------------------------------------------------|

Supplementary table S6: Results of patients in whom rapid ES was performed

| ID, Age, Sex       | Referral Diagnosis                   | Presenting features, HPO term, CKD stage                                                                             | Reason for Rapid ES                                                                  | ES result  | Gene, ES diagnosis, OMIM No.                                | Mutation description                                                                                                                                                                                                                                                                   | Clinical Course                                                                                                                                                                                                                                  |
|--------------------|--------------------------------------|----------------------------------------------------------------------------------------------------------------------|--------------------------------------------------------------------------------------|------------|-------------------------------------------------------------|----------------------------------------------------------------------------------------------------------------------------------------------------------------------------------------------------------------------------------------------------------------------------------------|--------------------------------------------------------------------------------------------------------------------------------------------------------------------------------------------------------------------------------------------------|
| P123<br>1m<br>Male | Ciliopathy                           | [HP:0000089] hyperechogenic kidneys<br>[HP:0005562] multiple renal cysts<br><br>3                                    | need for early diagnosis to determine frequency of review/surveillance and prognosis | diagnostic | <i>PKD1</i><br><br>AD Polycystic kidney disease 1<br>173900 | chr16:2140752G>A<br>NM_001009944.2(PKD1):c.12061C>T<br>NP_001009944.2(PKD1):p.(Arg4021*)<br>heterozygous missense variant, de novo, P<br><br>chr16:2164551G>A<br>NM_001009944.2(PKD1):c.2473C>T<br>NP_001009944.2(PKD1):p.(Arg825Trp)<br>heterozygous missense variant, paternal, VOUS | changed diagnosis; surveillance for extra renal involvement including yearly liver scans no longer required, testing of parents revealed de novo mutation, implications for them and patients sibling                                            |
| P169<br>14<br>Male | Steroid resistant nephrotic syndrome | [HP:0000100] nephrotic syndrome<br>[HP:0000717] autism biopsy consistent with FSGS<br><br>1                          | avoidance of renal biopsy and diagnostic trial of immunosuppression                  | diagnostic | <i>COL4A4</i><br><br>AD COL4A4 nephropathy<br>141200        | chr2:227985827<br>NM_000092.4(COL4A4):c.230G>C<br>NP_000083.3(COL4A4):p.(Gly77Ala)<br>heterozygous missense variant, LP                                                                                                                                                                | changed diagnosis; ophthalmology and audiology surveillance, additional diagnosis to SRNS and partial phenotype match, testing of parents and genetic counselling for sister prior to commencing family in future. In remission with cyclosporin |
| P187<br>7<br>Male  | Dents Disease versus Alport          | [HP:0000790] hematuria<br>[HP:0000093] proteinuria<br>[HP:0012408] medullary nephrocalcinosis<br>[HP:0000717] autism | avoidance of biopsy- some features of Alport but severe proteinuria out of keeping   | diagnostic | <i>CLCN5</i><br><br>XLR Dent disease<br>300009              | chrX:49851299dupC<br>NM_000084.4(CLCN5):c.1119dupC<br>NP_000075.1(CLCN5):p.<br>(Asn374Glnfs*2)<br>hemizygous nonsense variant, P                                                                                                                                                       | clarified suspected diagnosis; biopsy cancelled, ophtham and audiology surveillance ceased                                                                                                                                                       |





|                      |                                              |                                                                                                                                                                                                                 |                                                                                                                               |                                       |                                           |                                                                                                                                                                                                                                                                           |                                                                                                                                                  |
|----------------------|----------------------------------------------|-----------------------------------------------------------------------------------------------------------------------------------------------------------------------------------------------------------------|-------------------------------------------------------------------------------------------------------------------------------|---------------------------------------|-------------------------------------------|---------------------------------------------------------------------------------------------------------------------------------------------------------------------------------------------------------------------------------------------------------------------------|--------------------------------------------------------------------------------------------------------------------------------------------------|
| P122<br>4<br>Female  | Nephrotic syndrome - syndromic               | [HP:0000100] nephrotic syndrome<br>[HP:0000089] hyperechogenic kidneys<br>[HP:0000268] scaphocephaly<br>[HP:0002863] myelodysplasia<br>[HP:0004322] short stature<br>[HP:0000405] conductive hearing impairment | avoidance of renal biopsy and diagnostic trial of immunosuppression                                                           | diagnostic but not for kidney disease | <i>SAMD9</i><br>AD Mirage Syndrome 617053 | chr7:92732907<br>NM_017654.3(SAMD9):c.2504G>C<br>NP_060124.2(SAMD9):p.(Cys835Ser)<br>heterozygous missense variant, de novo, LP<br><br>chr7:92731354<br>NM_017654.3(SAMD9):c.4057A>G<br>NP_060124.2(SAMD9):p.(Lys1353Glu)<br>heterozygous missense variant, de novo, VOUS | No result for kidney disease, but explains bone marrow failure - recruitment to separate functional research for genomic cause of kidney disease |
| P199<br>43<br>Female | thin basement membrane disease versus Alport | [HP:0000093] proteinuria<br>[HP:0000822] hypertension<br>biopsy consistent with TBMD                                                                                                                            | to facilitate transplant planning: brother would commence dialysis soon and sister was only potential donor for consideration | non diagnostic                        | N/A                                       | N/A                                                                                                                                                                                                                                                                       | gene discovery research pathway underway, sister diagnosed with renal disease following renal genetics clinic                                    |
| P145<br>12<br>Female | Steroid resistant nephrotic syndrome         | [HP:0000100] nephrotic syndrome                                                                                                                                                                                 | avoidance of renal biopsy and diagnostic trial of immunosuppression                                                           | non diagnostic-VOUS identified        | <i>FAT1</i><br>FAT1 related nephropathy   | chr4:187557301T>C<br>NM_005245.3(FAT1):c.4061A>G<br>NP_005236.2(FAT1):p.(Glu1354Gly)<br>Heterozygous missense variant unknown, 3B                                                                                                                                         | avoided biopsy as anti-PLA2R antibodies returned soon after, managed as primary membranous nephropathy                                           |
| P065<br>1<br>Male    | Steroid resistant nephrotic syndrome         | [HP:0000100] nephrotic syndrome<br>[HP:0000790] hematuria<br>renal biopsy consistent with FSGS                                                                                                                  | differential diagnosis of SRNS - avoidance of renal biopsy and diagnostic trial of immunosuppression                          | non-diagnostic                        | N/A                                       | N/A                                                                                                                                                                                                                                                                       | renal biopsy consistent with FSGS, partial response to tacrolimus; treated as immunological FSGS                                                 |

1

|                    |        |                                                                                                                                                                                                                     |                                                                                                           |                |     |     |                                                           |
|--------------------|--------|---------------------------------------------------------------------------------------------------------------------------------------------------------------------------------------------------------------------|-----------------------------------------------------------------------------------------------------------|----------------|-----|-----|-----------------------------------------------------------|
| P173<br>55<br>Male | Alport | [HP:0000365] hearing impairment<br>[HP:0001256] intellectual disability, mild<br>[HP:0001650] aortic valvular stenosis<br>[HP:0000790] hematuria<br>[HP:0000093] proteinuria<br>[HP:0000089] hyperechogenic kidneys | rapid progression of CKD and difficult to biopsy in context of warfarinisation for mechanical heart valve | non-diagnostic | N/A | N/A | No change to management, no renal biopsy due to high risk |
|--------------------|--------|---------------------------------------------------------------------------------------------------------------------------------------------------------------------------------------------------------------------|-----------------------------------------------------------------------------------------------------------|----------------|-----|-----|-----------------------------------------------------------|

4

AD, Autosomal Dominant; AR, Autosomal Recessive; FSGS, Focal segmental glomerulosclerosis; N/A, Not applicable; PLA2R, Phospholipase-A2-receptor; ES, Exome sequencing.

Supplementary Figure 1. Diagnostic genes identified

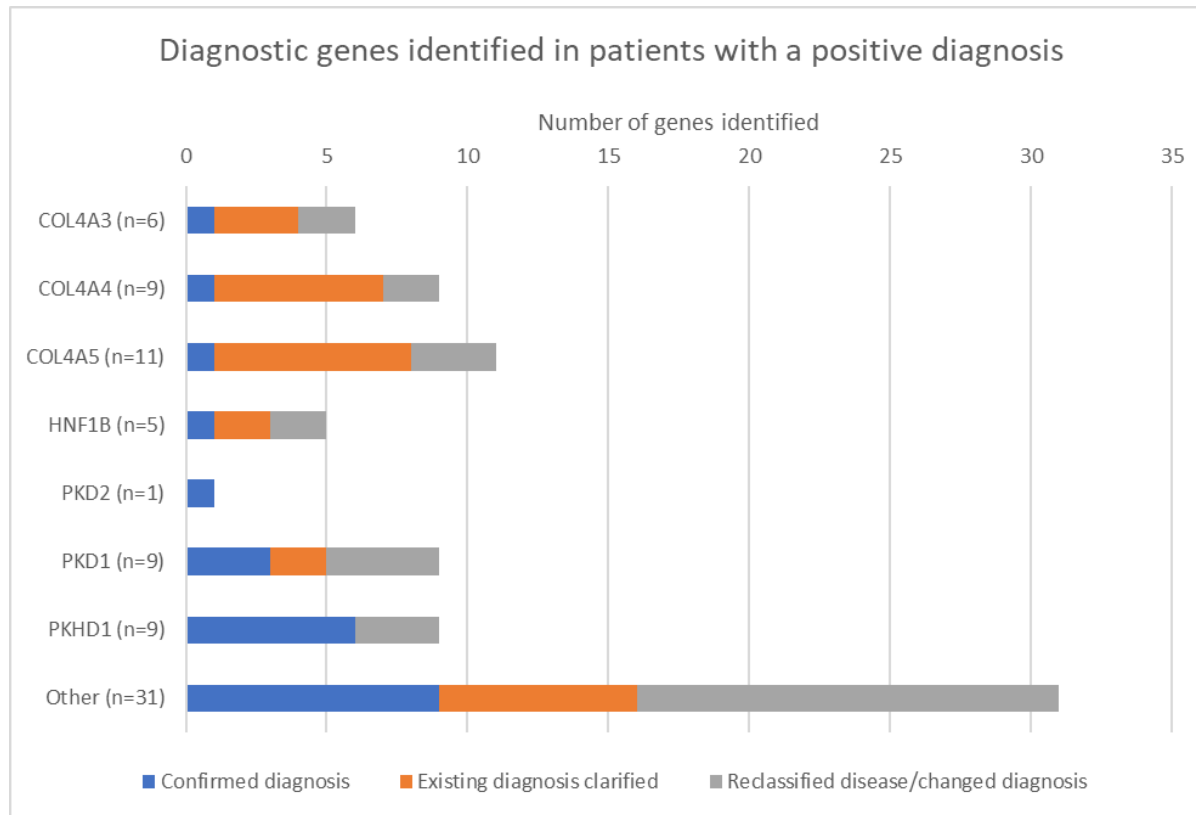

Supplemental Figure 2: Multivariable Logistic Regression analysis of baseline factors associated with a positive diagnosis. Estimates shown include adjusted odds ratios with 95% confidence intervals.

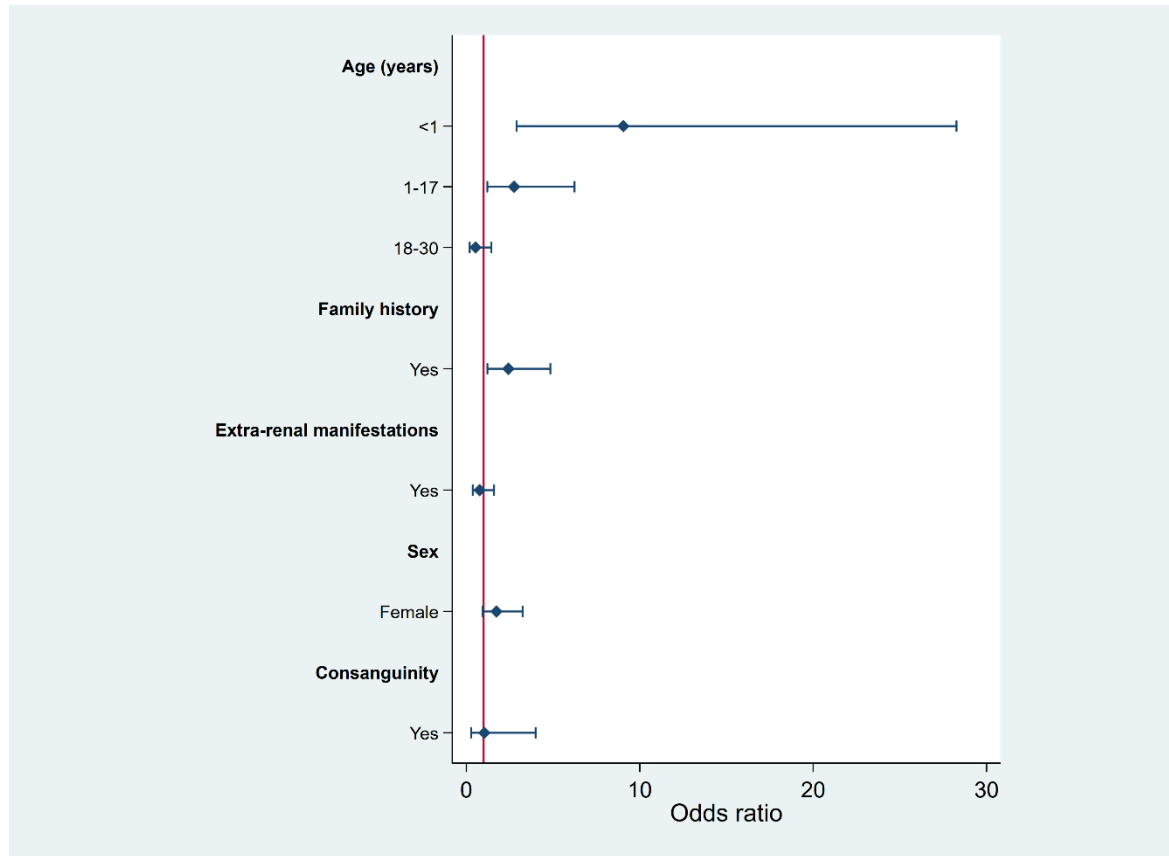

Supplement: 41436_2020_963_MOESM1_ESM.pdf [file 41436_2020_963_MOESM1_ESM.pdf]
